## Genome-wide association meta-analysis of spontaneous coronary artery dissection reveals common variants and genes related to artery integrity and tissue-mediated coagulation

David Adlam<sup>1,2\*</sup>, Takiy-Eddine Berrandou<sup>3\*</sup>, Adrien Georges<sup>3\*</sup>, Christopher P. Nelson<sup>1,2</sup>, Eleni Giannoulatou,<sup>4,5</sup> Joséphine Henry<sup>3</sup>, Lijiang Ma<sup>6</sup>, Montgomery Blencowe<sup>7,8</sup>, Tamiel N. Turley<sup>9</sup>, Min-Lee Yang<sup>10,11,12</sup>, Peter S. Braund<sup>1,2</sup>, Ines Sadeg-Sayoud<sup>3</sup>, Siiri E. Iismaa<sup>4,5</sup>, Matthew L. Kosel<sup>13</sup>, Xiang Zhou<sup>14</sup>, Stephen E. Hamby<sup>1,2</sup>, Jenny Cheng<sup>7,8</sup>, Lu Liu<sup>3</sup>, Ingrid Tarr<sup>4</sup>, David W.M. Muller<sup>4,5,15</sup>, Valentina d'Escamard<sup>16</sup>, Annette King<sup>17</sup>, Liam R. Brunham<sup>18</sup>, Ania A. Baranowska-Clarke<sup>1,2</sup>, Stéphanie Debette<sup>19</sup>, Philippe Amouyel<sup>20</sup>, Jeffrey W. Olin<sup>17</sup>, Snehal Patil<sup>14</sup>, Stephanie E. Hesselton<sup>4,5</sup>, Keerat Junday<sup>4,5</sup>, Stavroula Kanoni<sup>21</sup>, Krishna Aragam<sup>22,23,24,25</sup>, Adam S. Butterworth<sup>26,27,28</sup>, CARDioGRAMPlusC4D, MEGASTROKE, International stroke genetics consortium (ISGC) intracranial aneurysm working group, Marysia S. Tweet<sup>29</sup>, Rajiv Gulati<sup>29</sup>, Nicolas Combaret<sup>30</sup>, DISCO register investigators, Daniella Kadian-Dodov<sup>17</sup>, Jon Kalman<sup>31,32</sup>, Diane Fatkin<sup>4,5,15</sup>, Jacqueline Saw<sup>33</sup>, Tom R. Webb<sup>1,2</sup>, Sharonne N. Hayes<sup>29</sup>, Xia Yang<sup>7,8,34,35</sup>, Santhi K. Ganesh<sup>10,12</sup>, Timothy M. Olson<sup>29,36</sup>, Jason C. Kovacic<sup>4,5,15,16,17</sup>, Robert M. Graham<sup>4,5,15</sup>, Nilesh J. Samani<sup>1,2</sup>, Nabila Bouatia-Naji<sup>3</sup>

- 1 Department of Cardiovascular Sciences, Glenfield Hospital, Leicester, UK.
  - 2 NIHR Leicester Biomedical Research Centre, Glenfield Hospital,, Leicester, UK.
  - 3 Universite Paris Cite, PARCC, Inserm, F-75015, Paris, France.
  - 4 Victor Chang Cardiac Research Institute, Darlinghurst, NSW 2010, Australia, AUS.
  - 5 School of Clinical Medicine, UNSW Medicine and Health UNSW Sydney, Kensington, NSW, 2052, Australia.
  - 6 Department of Genetics and Genomic Sciences, Icahn School of Medicine at Mount Sinai, New York, USA.
  - 7 Department of Integrative Biology and Physiology, University of California., Los Angeles, California 90095, USA.
  - 8 Interdepartmental Program of Molecular, Cellular and Integrative Physiology, University of California, Los Angeles, California 90095, USA.
  - 9 Mayo Clinic Graduate School of Biomedical Sciences, Mayo Clinic., Rochester, Minnesota, USA.
  - 10 Division of Cardiovascular Medicine, Department of Internal Medicine, University of Michigan Medical School, Ann Arbor, MI, USA.
  - 11 Department of Computational Medicine and Bioinformatics, University of Michigan, Ann Arbor, MI, U.S.A.
  - 12 Department of Human Genetics, University of Michigan Medical School, Ann Arbor, MI, USA.
  - 13 Department of Quantitative Health Sciences, Mayo Clinic, Rochester, Minnesota, USA
  - 14 Department of Biostatistics, University of Michigan School of Public Health, Ann Arbor, MI, USA.
  - 15 Cardiology Department, St Vincent's Hospital, Darlinghurst, NSW 2010, Australia.
  - 16 Cardiovascular Research Institute, Icahn School of Medicine at Mount Sinai, New York, USA.
- NOTE: This preprint reports new research that has not been certified by peer review and should not be used to guide clinical practice.

- 17 Zena and Michael A. Wiener Cardiovascular Institute and Marie-Josée and Henry R, K. Kravis Center for Cardiovascular Health Icahn School of Medicine at Mount Sinai, New York, NY, USA.
- 18 Centre for Heart Lung Innovation, Departments of Medicine and Medical Genetics, University of British Columbia, Vancouver, Canada.
- 19 Department of Neurology, Bordeaux University Hospital, Inserm U1219, Bordeaux, France.
- 20 Univ. Lille, Inserm, CHU Lille, Institut Pasteur de Lille, U1167 - RID-AGE - Labex DISTALZ - Risk factors and molecular determinants of aging-related disease, F-59000 Lille, France.
- 21 William Harvey Research Institute, Barts and the London School of Medicine and Dentistry, Queen Mary University of London, Charterhouse square, London, EC1M 6BQ, UK.
- 22 Cardiovascular Research Center, Massachusetts General Hospital, 185 Cambridge St., Boston, MA, 02114, USA.
- 23 Center for Genomic Medicine, Massachusetts General Hospital, 185 Cambridge St., Boston, MA, 02114, USA.
- 24 Cardiovascular Disease Initiative, Broad Institute of MIT and Harvard, 75 Ames St., Cambridge, MA, 02142, USA.
- 25 Program in Medical and Population Genetics, Broad Institute of MIT and Harvard, 75 Ames St., Cambridge, MA, 02142, USA.
- 26 British Heart Foundation Cardiovascular Epidemiology Unit, Department of Public Health and Primary Care, University of Cambridge, Worts Causeway, Cambridge, CB1 8RN, UK
- 27 Health Data Research UK Cambridge, Wellcome Genome Campus and University of Cambridge, Cambridge, UK.
- 28 British Heart Foundation Centre of Excellence, Division of Cardiovascular Medicine, Addenbrooke's Hospital, Hills Road, Cambridge, UK.
- 29 Department of Cardiovascular Medicine, Mayo Clinic, Rochester, Minnesota, USA.
- 30 Department of Cardiology, CHU Clermont-Ferrand, CNRS, Université Clermont Auvergne, Clermont-Ferrand, France.
- 31 Department of Cardiology, Royal Melbourne Hospital, Melbourne, Victoria, Australia.
- 32 Department of Medicine, University of Melbourne, Melbourne, Victoria, Australia
- 33 Vancouver General Hospital, Division of Cardiology, University of British Columbia, Vancouver, Canada.
- 34 Institute for Quantitative and Computational Biosciences, U. o. C., Los Angeles, California 90095, USA.
- 35 Molecular Biology Institute, University of California, Los Angeles, California 90095, USA.
- 36 Department of Pediatric and Adolescent Medicine, Mayo Clinic, Rochester, Minnesota, USA.

\* Joint first authors.

Correspondence to [da134@leicester.ac.uk](mailto:da134@leicester.ac.uk) or [nabila.bouatia-naji@inserm.fr](mailto:nabila.bouatia-naji@inserm.fr)

## Abstract

Spontaneous coronary artery dissection (SCAD) is an understudied cause of acute myocardial infarction primarily affecting women. It is not known to what extent SCAD is genetically distinct from other cardiovascular diseases, including atherosclerotic coronary artery disease (CAD). Through a meta-analysis of genome-wide association studies including 1917 cases and 9292 controls of European ancestry, we identified 17 risk loci, including 12 new, with odds ratios ranging from 2.04 (95%CI 1.77-2.35) on chr21 to 1.25 (95%CI 1.16-1.35) on chr4. A locus on chr1 containing the tissue factor gene (*F3*), which is involved in blood coagulation cascade, appears to be specific for SCAD risk. Prioritized genes were mainly expressed in vascular smooth muscle cells and fibroblasts of arteries and are implicated predominantly in extracellular matrix biology (e.g. *COL4A1/A2*, *HTRA1* and *TIMP3*). We found that several variants associated with SCAD had diametrically opposite associations with CAD suggesting that shared biological processes contribute to both diseases but through different mechanisms. We also demonstrated an inferred causal role for high blood pressure, but not other CAD risk factors, in SCAD. Our findings provide novel pathophysiological insights involving arterial integrity and tissue-mediated coagulation in SCAD and set the stage for future specific therapeutics and prevention for this disease.

## Introduction

Cardiovascular disease is the leading cause of death in women but sex-specific aspects of the risk of heart disease and acute myocardial infarction (AMI) remain under-studied.<sup>1</sup> Spontaneous coronary artery dissection (SCAD) and atherosclerotic coronary artery disease (CAD) are both causes of acute coronary syndromes leading to AMI.<sup>2-6</sup> However, in contrast with CAD, SCAD affects a younger, predominantly female population,<sup>7</sup> and arises from the development of a haematoma leading to dissection of the coronary tunica media with eventually formation of a false lumen, rather than atherosclerotic plaque erosion or rupture.<sup>8</sup> SCAD has been clinically associated with migraine<sup>9</sup> and extra-coronary arteriopathies including fibromuscular dysplasia (FMD).<sup>10-13</sup> However, co-existent coronary atherosclerosis is uncommon.<sup>8,14</sup> Whilst the genetic basis of CAD is increasingly well established,<sup>15</sup> the pathophysiology of SCAD remains poorly understood.<sup>4</sup> The search for highly penetrant mutations in candidate pathways or by sequencing has had a low yield, often pointing to genes involved in other clinically undiagnosed inherited syndromes manifesting as SCAD.<sup>16</sup> Previous investigation of the impact of common genetic variation on the risk of SCAD has described 5 confirmed risk loci.<sup>17-21</sup>

Here we performed a meta-analysis genome-wide association studies (GWAS) comprising 1917 SCAD cases and 9292 controls of European ancestry. We identified 17 risk loci, including 12 new association signals demonstrating a substantial polygenic heritability for this disease. Importantly, we show that several common genetic risk loci for SCAD are shared with CAD but have a directionally opposite effect and a different genetic contribution of established cardiovascular risk factors. These findings implicate arterial integrity related to extracellular matrix biology, vascular tone, and tissue coagulation in the pathophysiology of SCAD.

## Results

### ***GWAS meta-analysis and SNP heritability***

We conducted a GWAS meta-analysis from eight independent case control studies (**Supplementary Fig. 1, Supplementary Fig. 2, Supplementary Table 1**). Seventeen loci demonstrated genome-wide significant signals of association with SCAD, among which 12 were newly described for this disease, including one locus on chromosome X (**Table 1, Fig. 1A**).

**Table 1. Lead associated variants at genome-wide significant SCAD loci.**

EA: effect alleles, OA: other alleles. EAF: effect allele frequencies. Het: P-value from the Cochran-Q statistic heterogeneity test. Direction signs are provided for the individual association results in DISCO-3C, SCAD-UKI, Mayo Clinic, UBC/MGI, VCCRI, SCAD-UK II, VCCRI II and DEFINE-SCAD studies, respectively. Grey lines correspond to previously reported loci in SCAD.

| Chr          | Position   | rsID                   | Annotated Genes | EA | OA   | EAF               | SCAD GWAS meta-analysis (1917 cases and 9792 Controls) |         |           |     |
|--------------|------------|------------------------|-----------------|----|------|-------------------|--------------------------------------------------------|---------|-----------|-----|
|              |            |                        |                 |    |      |                   | OR (95%CI)                                             | P       | Direction | Het |
| 1:59656909   | rs34370185 | <i>FGGY-DT</i>         | T               | G  | 0.29 | 1.34 (1.24--1.46) | $1.4 \times 10^{-12}$                                  | +++++++ | 0.04      |     |
| 1:95050472   | rs1146473  | <i>F3</i>              | C               | T  | 0.19 | 1.32 (1.20--1.45) | $5.8 \times 10^{-9}$                                   | +++++++ | 0.10      |     |
| 1:150504062  | rs4970935  | <i>ECM1/ADAMTSL4</i>   | C               | T  | 0.28 | 1.72 (1.59--1.87) | $6.1 \times 10^{-39}$                                  | +++++++ | 0.64      |     |
| 4:7774352    | rs6828005  | <i>AFAP1</i>           | G               | A  | 0.45 | 1.29 (1.20--1.40) | $2.6 \times 10^{-11}$                                  | +++++++ | 0.82      |     |
| 4:146788035  | rs1507928  | <i>ZNF827</i>          | C               | T  | 0.48 | 1.25 (1.16--1.35) | $8.9 \times 10^{-9}$                                   | +++++++ | 0.38      |     |
| 5:52155642   | rs73102285 | <i>ITGA1</i>           | G               | A  | 0.27 | 1.27 (1.17--1.38) | $1.1 \times 10^{-8}$                                   | +++++   | 0.31      |     |
| 6:12903957   | rs9349379  | <i>PHACTR1</i>         | A               | G  | 0.62 | 1.64 (1.51--1.78) | $2.9 \times 10^{-32}$                                  | +++++++ | 0.19      |     |
| 10:124259062 | rs2736923  | <i>HTRA1</i>           | A               | G  | 0.89 | 1.44 (1.26--1.64) | $4.6 \times 10^{-8}$                                   | +++++?  | 0.60      |     |
| 11:95308854  | rs11021221 | <i>SESN3/FAM76B</i>    | A               | T  | 0.17 | 1.47 (1.33--1.61) | $4.1 \times 10^{-15}$                                  | +++++++ | 0.19      |     |
| 12:57527283  | rs11172113 | <i>LRP1</i>            | T               | C  | 0.62 | 1.62 (1.49--1.76) | $9.0 \times 10^{-31}$                                  | +++++++ | 0.70      |     |
| 12:89978233  | rs1689040  | <i>ATP2B1</i>          | C               | T  | 0.59 | 1.28 (1.18--1.39) | $7.0 \times 10^{-10}$                                  | +++++   | 0.66      |     |
| 13:110838236 | rs7326444  | <i>COL4A1</i>          | G               | A  | 0.64 | 1.31 (1.21--1.42) | $1.0 \times 10^{-10}$                                  | +++++   | 0.52      |     |
| 13:111040681 | rs11838776 | <i>COL4A2</i>          | G               | A  | 0.73 | 1.50 (1.37--1.65) | $2.5 \times 10^{-18}$                                  | +++++   | 0.42      |     |
| 15:48763754  | rs7174973  | <i>FBN1</i>            | G               | A  | 0.11 | 1.54 (1.37--1.72) | $1.6 \times 10^{-13}$                                  | +++++++ | 0.03      |     |
| 71628370     | rs10851839 | <i>THSD4</i>           | A               | T  | 0.68 | 1.32 (1.22--1.44) | $5.5 \times 10^{-11}$                                  | +++++++ | 0.24      |     |
| 21:35593827  | rs28451064 | <i>LINC00310/KCNE2</i> | G               | A  | 0.88 | 2.04 (1.77--2.35) | $1.2 \times 10^{-22}$                                  | +++++++ | 0.50      |     |
| 22:33282971  | rs137507   | <i>SYN3</i>            | T               | C  | 0.11 | 1.38 (1.23--1.55) | $3.3 \times 10^{-8}$                                   | +++++++ | 0.02      |     |
| X:34489890   | rs5973204  | <i>SRSF2P1/TMEM47</i>  | T               | C  | 0.20 | 1.36 (1.22--1.51) | $3.0 \times 10^{-8}$                                   | +++++++ | 0.16      |     |

**Figure 1**

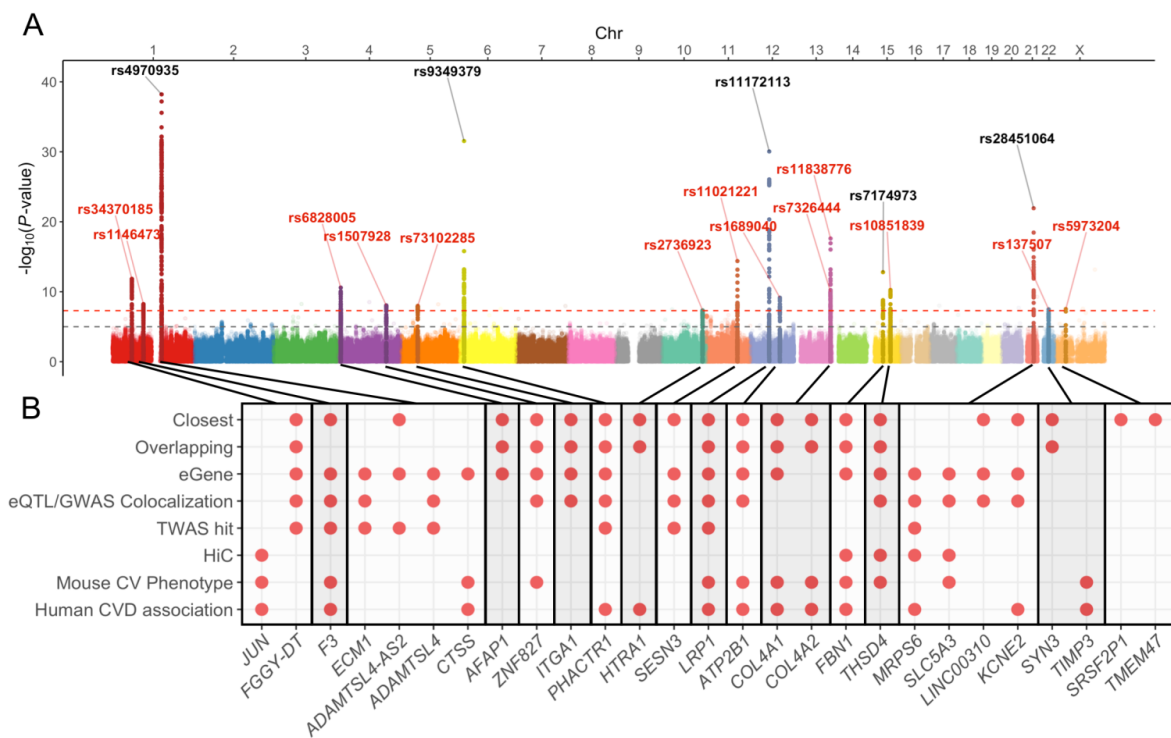

**Figure 1. GWAS meta-analysis main association results, heritability estimates and gene prioritisation at risk loci.**

**A:** Manhattan plot representation of SNP-based association meta-analysis in SCAD.  $-\log_{10}$  of association  $P$ -value (from a two-sided Wald test) is represented on the  $y$ -axis, genomic coordinates on the  $x$ -axis. SNPs located  $\pm 500\text{kb}$  of genome-wide significant signals are highlighted. rsIDs of independent lead SNPs with  $P\text{-value} \leq 5 \times 10^{-8}$  are indicated. Label colours indicate newly identified loci (red) and previously known loci (grey). Dashed red line:  $P\text{-value} = 5 \times 10^{-8}$ . Dashed grey line:  $P\text{-value} = 1 \times 10^{-5}$ . **B:** Annotation of potential candidate genes at each SCAD locus. A red dot indicates that the corresponding gene fulfils one of the following eight criteria: 1) Closest gene upstream or downstream of SCAD lead SNP; 2) gene overlapping variants in the set of potential causal variants; 3) gene is an eGene of SCAD lead SNP in aorta, coronary artery, tibial artery, fibroblasts or whole blood samples from GTEx (v8 release); 4) colocalization of SCAD association signal and eQTL association in one of these 5 tissues; 5) the gene was a TWAS hit in any of the same 5 tissues; 6) promoter of the gene is in a chromatin loop with variants in the set of potential causal variants in human aorta tissue, as determined using HiC<sup>51</sup>; 7) Gene knockout is known to be associated with a cardiovascular phenotype in mouse; or 8) an existing association of gene with a cardiovascular disease in humans. Prioritized genes included genes with most criteria at any loci and any genes fulfilling at least 3 criteria.

One locus on chromosome 4 (*AFAP1*) was recently reported for SCAD in the context of pregnancy<sup>19</sup> is now confirmed as generally involved in SCAD (**Table 1**). Estimated odds ratios of associated loci ranged from 1.25 (95%CI 1.16-1.35) in *ZNF827* on chromosome 4 to 2.04 (95%CI 1.77-2.35) on chromosome 21 near *KCNE2* (**Table 1**). We report evidence for substantial polygenicity for SCAD with an estimated SNP-based heritability above 0.70 ( $h^2_{SNP} = 0.71 \pm 0.11$  on the liability scale using LD score regression,<sup>22</sup> and  $h^2_{SNP} = 0.70 \pm 0.12$  using SumHer<sup>23</sup>, **Supplementary Table 2**). The *FALEC/ADAMTSL4-AS2* locus on Chr1 accounted for the largest proportion of heritability for SCAD in our dataset ( $h^2 = 0.028$ ), followed by the *COL4A1-COL4A2* locus, which contained 2 independent GWAS signals ( $h^2 = 0.022$ , **Supplementary Table 3, Supplementary Fig. 3**). Overall, we estimate that the 16 autosomal loci explain ~24% of the total SNP-based heritability of SCAD (**Supplementary Table 3**).

### ***Functional annotation of variants in SCAD loci***

We found SCAD-associated variants to be significantly enriched in enhancer marks specific to gene expression in arterial tissues from ENCODE<sup>24</sup> (e.g. aorta, tibial artery, thoracic aorta and coronary artery), as well as several smooth muscle cell rich tissues (e.g. colon, small intestine, uterus) (**Supplementary Fig. 4**). Based on recently published analyses of single-cell open chromatin in 30 adult tissues,<sup>25</sup> we determined that vascular smooth muscle cells (VSMCs) and fibroblasts were the top enriched cell types for SCAD-associated loci among clusters represented in aorta and tibial artery datasets (**Fig. 2A, Supplementary Fig. 5**). Consistently, all but one SCAD locus included at least one variant that overlapped with enhancer marks or open chromatin peaks in coronary artery tissue, VSMCs or fibroblasts (**Supplementary Fig. 6, Supplementary Table 4**). Among SCAD top associated variants, 14 were expression quantitative trait loci (eQTLs) for nearby genes in aorta, coronary or tibial artery, whole blood or cultured fibroblasts (**Fig. 1B, Supplementary Table 5**).



Figure 2

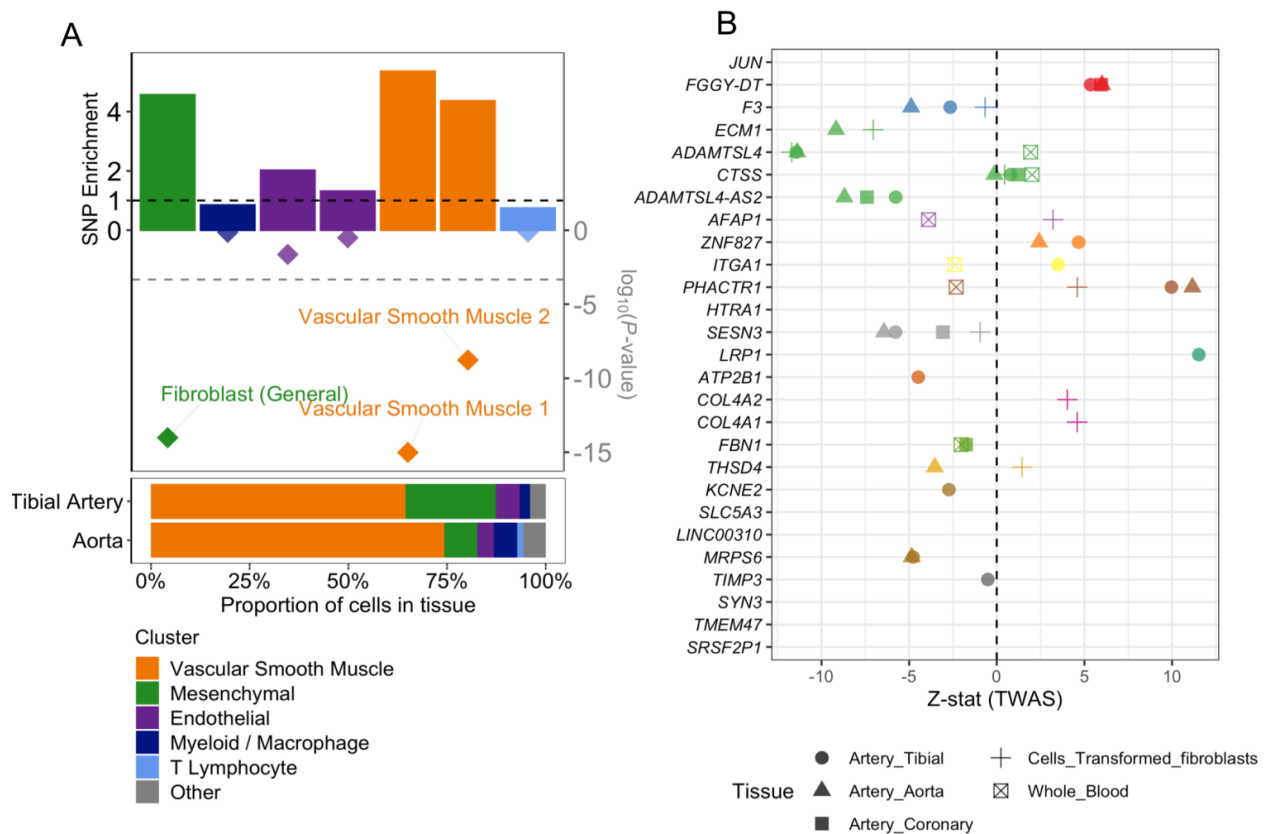

**Figure 2. Enrichment of SCAD SNPs in open chromatin regions from arterial cells and genetically predicted expression changes of nearby genes**

**A:** Upper panel: Representation of SCAD SNPs fold-enrichment (upper y-axis) and enrichment  $P$ -value (log scale, lower y-axis) among open chromatin regions of 7 single-cell sub clusters contributing to >1% of cells in artery tissue<sup>25</sup>. A random background was created for each open chromatin dataset by randomly selecting 1000 sets of size and chromosome matched regions from the genome. Enrichment represents the ratio of the number of SCAD SNPs overlapping open chromatin regions over the average number of SCAD SNPs overlapping background regions.  $P$ -value was evaluated using a binomial test with greater enrichment as alternative hypothesis. Lower dashed line represents the threshold for significance ( $P < 0.05$ ) after adjusting for 105 sub clusters. Lower panel: Composition of artery tissues relative to 105 single-cell sub clusters determined from single-nuclei ATAC-Seq in 30 adult tissues<sup>25</sup>. Only sub clusters representing more than 1% of cells from either aorta or tibial artery were represented. **B:** Representation of SCAD TWAS Z-score for SCAD candidate genes. Z-score is indicated along the x-axis. Point shape indicates the tissue for TWAS association. Point colour is used to distinguish between genes located in different SCAD loci.

### ***Tissue coagulation initiation as a novel biological mechanism and predominance of extracellular matrix biology in SCAD risk***

We applied a multi-source strategy to identify candidate genes at risk loci. We prioritized genes that were *i*) the closest or the overlapping genes with the top associated variants, *ii*) targets of eQTLs colocalizing with GWAS signal (**Supplementary Fig. 7A, Supplementary Table 5**) or transcriptome-wide association study (TWAS) hits in at least one tissue relevant to arterial dissection (aorta, coronary or tibial artery, fibroblasts or whole blood from GTEx), (**Supplementary Fig. 7B, Supplementary Table 6**), *iii*) genes involved in significant long-range chromatin conformation interactions from Hi-C data with SCAD associated variants in aorta or *iv*) genes with biological function linked to the cardiovascular system in mice or humans. We identified 1 to 2 specific and strong candidate genes in 13 loci (**Fig. 1B**). For instance, tissue factor gene (*F3*) stood up as the most likely target gene near rs1146473 ( $OR=1.32$ ,  $P=5.8 \times 10^{-9}$ ), a locus on chromosome 1 that we describe as novel for SCAD or any cardiovascular disease

or trait so far. *F3* is the closest coding gene to the association signal, and was a TWAS hit in artery tissues (**Supplementary Fig. 7B**). In addition, the rs1146473 risk allele for SCAD confidently (PP=94%) colocalised with an eQTL signal with *F3* in aorta supporting the genetic risk to be potentially through lower *F3* expression in arteries (**Supplementary Table 5, Fig. 2B**). Tissue factor, also known as coagulation factor III, forms a complex with factor VIIa, that is the primary initiator of blood coagulation. Hence, reduced factor III expression is potentially a key biological mechanism contributing to hematoma formation in coronary arteries of SCAD survivors.

To globally assess the biological mechanisms involving prioritized genes, we applied a network query based on Bayesian gene regulatory networks constructed from expression and genetics data from arterial tissues and fibroblasts.<sup>26-28</sup> We found the extracellular matrix organisation to be the biological function where most prioritized genes and their respective immediate subnetworks clustered (**Supplementary Fig. 8**). Among genes we prioritized in novel loci, a number encode proteins involved in extracellular matrix formation, including integrin alpha 1 (*ITGA1*), basement membrane constituent collagen type IV alpha 1 chain (*COL4A1*) and alpha 2 chain (*COL4A2*), serine protease HtrA serine peptidase 1 (*HTRA1*), metallopeptidase thrombospondin type 1 domain containing 4 (*THSD4*), a partner of previously reported SCAD locus fibrillin 1 (*FBN1*), and TIM metallopeptidase inhibitor 3 (*TIMP3*). Of note, the *F3* subnetwork also clustered in the extracellular matrix organisation and connected with *HTRA1* and *TIMP3* subnetworks through Bayesian network edges from aorta and coronary artery (**Supplementary Fig. 8**).

### Shared genetics between SCAD and arterial diseases

With the exception of the *F3* locus, SCAD risk loci located within 1 megabase of the top SCAD variants were at least suggestively ( $P < 10^{-5}$ ) associated with other forms of cardiovascular and neurovascular disease (**Fig. 3A, Supplementary Table 7**). Using trait colocalization analyses, we found that the same variants were likely to be causal both for SCAD and the other diseases or traits at 15 loci (**Fig. 3A**). However, directions of effects were not systematically consistent across loci for all diseases.

Figure 3

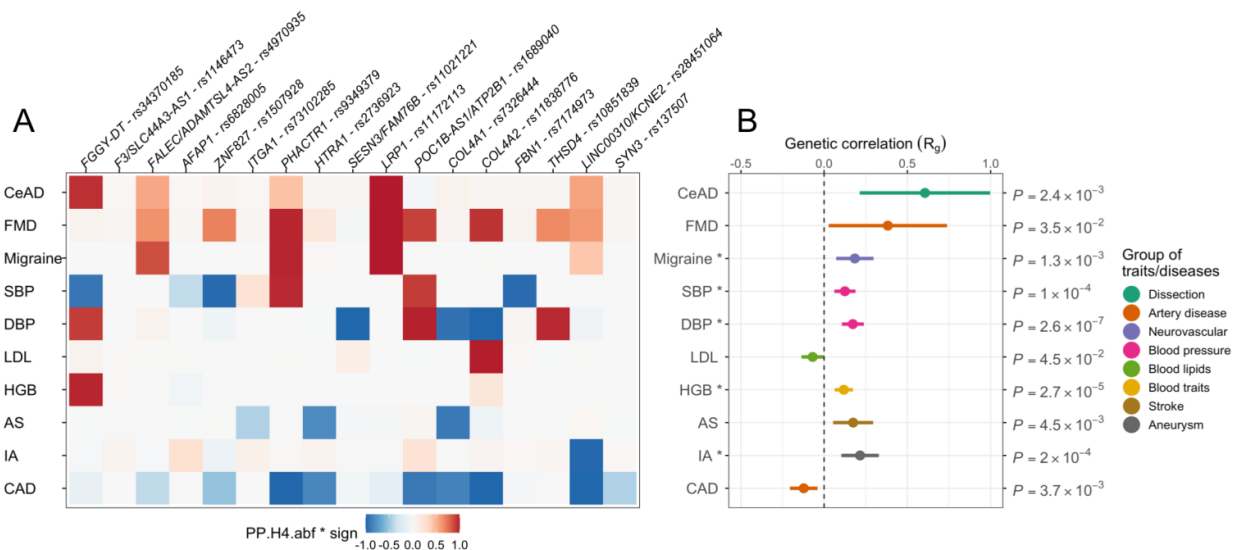



**Figure 3: Colocalization and genetic correlation of SCAD genetic association with cardiovascular/neurovascular traits/diseases.**

**A:** Heatmap represents the colocalization of SCAD signals with GWAS analysis of 10 independent traits/diseases: cervical artery dissection (CeAD), multifocal fibromuscular dysplasia (FMD), migraine, blood pressure (SBP: systolic, DBP: diastolic), low-density lipoprotein cholesterol blood concentration (LDL), haemoglobin concentration (HGB), stroke (AS: any stroke), intracranial aneurysm (IA) and coronary artery disease (CAD). Tile colour represents the H4 coefficient of approximate Bayes factor colocalization, i.e. posterior probability for the two traits to share one causal variant at the locus (PP.H4.abf, 0 to 1), multiplied by the sign of colocalization (+1 is both traits have the same risk/higher value allele, -1 for opposed risk/higher value allele) on a blue/white/red color scale. **B:** Forest plot representing genetic correlation of SCAD and the aforementioned 10 traits/diseases. Rho coefficient of genetic correlation ( $r_g$ ) is represented on the x-axis. Range indicates the 95% confidence interval. Unadjusted P-value of correlation is indicated. \* indicates significant associations ( $P_{adj} < 0.05$ ) after adjusting for 28 traits (**Supplementary Table 8**).

Globally, SCAD loci showed evidence for high posterior probability (PP) for the same risk alleles to also be likely causal for FMD and cervical artery dissection (CeAD) (**Fig. 3A, Supplementary Table 7**). LDSC-based genetic correlations indicated SCAD to positively correlate with FMD ( $r_g=0.38 \pm 0.18$ ;  $P=0.03$ ) and CeAD ( $r_g=0.61 \pm 0.20$ ;  $P=2.4 \times 10^{-3}$ , **Fig. 3B, Supplementary Table 8**), which is consistent with the clinical observation of the frequent co-existence of these arteriopathies in SCAD patients. For instance, FMD is reported in ~40 to 60% of SCAD patients.<sup>11,29</sup> Stratified analyses in the largest four case-control studies where FMD arteriopathies were screened indicated globally similar associations with SCAD (**Supplementary Fig. 9, Supplementary Table 9**). Finally, genetic correlations indicated SCAD to positively correlate with several neurovascular diseases where predominantly arterial structure and/or function are altered, including stroke ( $r_g=0.17 \pm 0.06$ ;  $P=4.5 \times 10^{-3}$ ), migraine ( $r_g=0.18 \pm 0.06$ ;  $P=1.3 \times 10^{-3}$ ), intracranial aneurysm ( $r_g=0.22 \pm 0.06$ ;  $P=2.0 \times 10^{-4}$ ), and subarachnoid haemorrhage ( $r_g=0.27 \pm 0.07$ ;  $P=6.4 \times 10^{-5}$ ) (**Fig. 3B, Supplementary Table 8**).

### ***Opposite genetic link between SCAD and atherosclerotic coronary artery disease***

While CAD patients are predominantly men (~75%), who often have pre-existing cardiometabolic comorbidities, (mainly dyslipidaemia, hypertension and type 2 diabetes), SCAD patients are on average younger, present with fewer cardiovascular risk factors, and are overwhelmingly women (>90%).<sup>2,4</sup> Using genetic association colocalization and genetic correlation we genetically compared SCAD with CAD. We found that among SCAD loci, several were known to associate with CAD. Disease association colocalization analyses showed that, for 6 loci, SCAD and CAD are likely to share the same causal variants with high posterior probabilities (PP H4: 84 to 100%) but all with opposite risk alleles (**Fig. 3A, Supplementary Table 7**). Genetic correlation confirmed a genome-wide negative correlation between SCAD and CAD ( $r_g=-0.12 \pm 0.04$ ;  $P=3.7 \times 10^{-3}$ ) (**Supplementary Table 8**), including after conditioning SCAD GWAS results on SBP or DBP GWAS results using mtCOJO<sup>30</sup> ( $r_{CAD/SBP}=-0.19 \pm 0.04$ ,  $P=P=4.6 \times 10^{-6}$ ;  $r_{CAD/DBP}=-0.19, \pm 0.04$ ,  $P=P=1.3 \times 10^{-5}$ ) (**Supplementary Table 10, Supplementary Fig. 10**).

### ***CVD risk factors and risk of SCAD and CAD***

We found that SCAD shared several causal variants with systolic and diastolic blood pressure, involving both the same and opposite directional effects (**Fig. 3A, Supplementary Table 7**). We found several shared loci with haemoglobin levels and a significant genetic correlation with SCAD ( $r_g=0.12 \pm 0.03$ ;  $P=2.7 \times 10^{-5}$ , **Fig. 3B**). However, SCAD loci were not shared with BMI,

lipid traits including LDL and HDL, type 2 diabetes or smoking and these traits did not correlate with SCAD at the genomic level (**Supplementary Tables 7 and 8**). Interestingly, we found significant positive genetic correlations both with systolic ( $rg=0.12 \pm 0.03$ ;  $P=1.0 \times 10^{-4}$ ) and diastolic ( $rg=0.17 \pm 0.03$ ;  $P=2.6 \times 10^{-7}$ ) blood pressure, indicating a shared genetic basis with SCAD (**Fig. 3B, Supplementary Table 8**). To assess the extent to which blood pressure and main cardiovascular risk factors may contribute to the risk of SCAD, we leveraged existing GWAS datasets to identify instrumental variables and conducted comparative Mendelian randomization associations with SCAD or CAD. We found robust significant associations estimated by inverse variance weighted (IVW), MR-Egger and weighted median methods between genetically-predicted blood pressure traits and increased risk of SCAD ( $\beta_{IVW-SBP}=0.05 \pm 0.01$ ,  $P=7.6 \times 10^{-6}$ ,  $\beta_{IVW-DBP}=0.10 \pm 0.02$ ,  $P=1.9 \times 10^{-8}$ ) and CAD ( $\beta_{IVW-SBP}=0.04 \pm 0.002$ ,  $P=8.6 \times 10^{-49}$ ;  $\beta_{IVW-DBP}=0.06 \pm 0.004$ ,  $P=1.6 \times 10^{-44}$ ) (**Fig. 4, Supplementary Table 11**). Similar associations were estimated when we analysed only women with SCAD, women with CAD and men with CAD; analyses only in men with SCAD were limited by the extremely small numbers of male cases (**Supplementary Table 12**). Genetically determined BMI, lipid traits, type 2 diabetes and smoking did not influence the risk for SCAD. However, we were able to overall confirm that these cardiometabolic traits are strong genetic risk factors for CAD (**Fig. 4**). Our findings indicate that genetically elevated blood pressure is the only shared genetic risk factor between SCAD and CAD, albeit involving potentially different genetic loci.

Figure 4

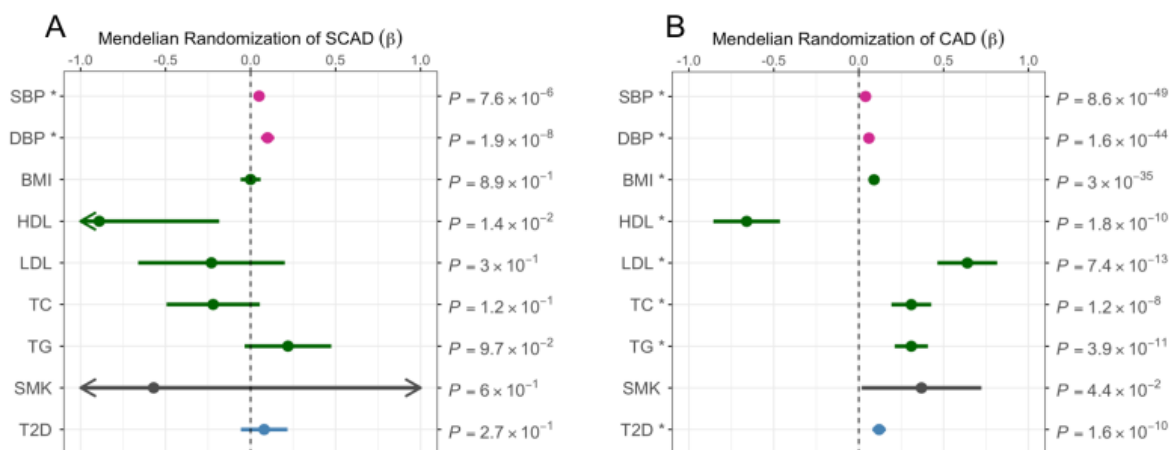

**Figure 4. Mendelian randomization associations between main cardiovascular risk factors and SCAD or CAD.**

Forest plots representing Mendelian Randomization associations between main cardiovascular risk factors and SCAD (A) or CAD (B). Association estimates ( $\beta$ ) obtained from Mendelian randomization analyses using inverse variance weighted method (IVW) are represented on the x-axis where range represents the 95% CI. Unadjusted  $P$ -values of the associations are indicated. Traits analysed were abbreviated as follows: Systolic blood pressure (SBP), Diastolic blood pressure (DBP), Body mass index (BMI), High-density lipoprotein (HDL), Low-density lipoprotein (LDL), Total cholesterol (TC), Triglycerides (TG), Smoking (SMK).

## Discussion

Here we provide the largest study to date aimed to understanding the genetic basis of SCAD, an understudied cause of AMI that primarily affects women. We report novel associations and demonstrate high polygenic heritability for SCAD. We leverage integrative functional annotations to prioritize genes, which are predominantly expressed by VSMCs and fibroblasts of arteries. Insights from biological functions of genes highlight the central role of extracellular matrix integrity and reveal impaired tissue coagulation as a novel potential mechanism for SCAD. Globally, we demonstrate the polygenic basis of SCAD to be shared with an important set of cardiovascular diseases. However, a striking directionally opposite genetic impact is found with atherosclerotic coronary artery disease (CAD), involving multiple risk loci and leading to a genome-wide negative genetic correlation. We provide evidence supporting that genetically predicted higher blood pressure as an important risk factor for SCAD, but not other well-established cardiovascular factors. Our results set the stage for future investigation of novel biological pathways relevant to both SCAD and CAD and potential therapeutic and preventive strategies specifically targeting SCAD.

As an understudied condition, previously thought to be uncommon, SCAD was initially suspected to involve rare and highly penetrant mutations. However, recent sequencing studies have suggested that only a small proportion (~3.5%) of SCAD cases are due to rare variants.<sup>16,31</sup> This is in keeping with increasing clinical recognition suggesting that this condition is not rare.<sup>2,4</sup> Despite a modest sample size, we identified 17 risk loci accounting for about a quarter of the polygenic heritability that we estimate to be ~71% indicating SCAD therefore to be predominantly a complex polygenic disease.

This study supports the presence of genetic overlap between risk of SCAD and other vascular diseases, involving generally younger individuals and more women such as cervical arterial dissection, migraine, subarachnoid haemorrhage and FMD. These conditions are reported to occur at increased frequency in SCAD patients,<sup>10-13</sup> supporting shared causal biological mechanisms. Among the genes we prioritize as novel SCAD loci, we highlight the ATPase plasma membrane Ca<sup>2+</sup> transporting 1 gene (*ATP2B1*) that we have recently reported to associate with FMD,<sup>32</sup> a well-established locus for blood pressure risk<sup>33</sup> via its role in VSMCs intracellular calcium homeostasis and blood pressure regulation.<sup>34</sup> Most importantly, we provide evidence for a causal genetic effect of both systolic and diastolic blood pressure in SCAD risk. These findings provide an important genetic basis to support observational data suggesting control of blood pressure may be an important factor in reducing the risk of recurrence after SCAD.<sup>35</sup> However, our findings also suggest that controlling other causal risk factors for CAD, such as LDL cholesterol with statins, may confer less benefit in SCAD than in CAD.

Knowledge of the molecular mechanisms leading to SCAD has been limited. Insights from sequencing studies of rare genetic variants has shown most are associated with genes known from hereditary connective tissue disorders such as vascular Ehlers-Danlos, Loeys-Dietz, Marfan syndromes, and adult polycystic kidney disease.<sup>16,31</sup> In this study, we identify the regulation of the extracellular matrix of arteries as the predominant polygenic biological mechanism for SCAD. Integrative prioritisation analyses revealed 13 potential causal genes with established key roles in maintaining arterial wall integrity and function. Among these, we highlight the serine protease *HTRA1* and metalloproteinase inhibitor *TIMP3* that are involved

in matrix disassembly. Interestingly, we found a novel association signal with SCAD in the metallopeptidase thrombospondin type 1 domain containing 4 gene (*THSD4*) that promotes fibrillin-1 (FBN1) elastic fibre assembly, and confirm the previously reported associations with *ADAMTSL4* and *FBN1*.<sup>18,20</sup> We showed that genetically decreased expressions of these genes in arteries were correlated with higher SCAD risk alleles in arteries or fibroblasts. This finding suggests that a genetic predisposition to a weaker extracellular matrix may increase the vulnerability of traversing intramural micro-vessels to disruption, increasing the risk of initiation and propagation of a false lumen within the coronary vessel wall leading to SCAD.

A striking finding from our study is the identification of tissue factor gene (*F3*), a critical component of tissue-mediated blood coagulation, as a strong candidate gene in a risk locus for SCAD. We found that genetically determined lower expression of *F3* in arterial tissue was associated with a higher risk for SCAD, involving variants located in putative functional regulatory elements in the coronary artery, VSMCs and fibroblasts. Tissue factor is synthesized at the subendothelial level of VSMCs and by fibroblasts in the adventitia surrounding the arteries.<sup>36</sup> In SCAD, once an intramural haemorrhage has initiated, propagation and pressurisation of the false lumen may depend, in part, on coagulation and stabilisation of the haematoma. Tissue factor is widely studied in the context of pro-thrombotic conditions, including atherosclerosis, although notably the genetic variants we describe here do not associate with atherosclerotic disease. This feature is an exception to the highly pleiotropic nature of the variants we describe in the remaining SCAD loci, suggesting that impaired tissue-initiated coagulation as a putative specific mechanism in SCAD.

Many of the risk loci and their prioritized genes we report here for SCAD are already known from atherosclerotic disease GWAS. However, here we provide compelling and intriguing evidence for the opposite directionality of a substantial fraction of genetic basis for SCAD versus CAD, suggesting some key biological mechanisms involved in the two diseases are also likely to be opposite. For example, the association signals in the *COL4A1-COL4A2* locus are in an opposite direction to their contribution to CAD.<sup>37</sup> This locus encodes  $\alpha 1$  and  $\alpha 2$  chains of type IV collagen, with transcripts generated through a common promoter. Type IV collagen is the main component of basement membrane of arterial cells and plays a key role in the structural integrity and biological functions of VSMCs in the *tunica muscularis*. Reduced collagen IV expression increases the risk of CAD.<sup>15,38</sup> Proposed potential mechanisms for this include a disinhibition of VSMC-intimal migration during atherogenesis or an increase in the vulnerability of atherosclerotic plaque to rupture.<sup>38</sup> In contrast to CAD, our data indicates that genetically mediated increased collagen IV expression also increased the risk of SCAD. Better understanding of how these directionally opposite changes modify risk of CAD and SCAD have considerable potential to enhance understanding of the molecular genetic mechanisms that confer risk in both diseases.

## Funding

This study was supported by the European Research Council grant (ERC-Stg-ROSALIND-716628), The French Society of Cardiology through *Fondation "Coeur et Recherche"*, "La Fédération Française de Cardiologie", and the French Coronary Atheroma and Interventional Cardiology Group (GACI), the British Heart Foundation (PG/13/96/30608, SP/16/4/32697), the Leicester NIHR Biomedical Research Centre, BeatSCAD, National Health and Medical Research

Council (NHMRC), Cardiac Society of Australia and New Zealand (CSANZ) Cardiovascular Research Innovation Grant Australia (APP1161200), NSW Health Early Mid-Career Cardiovascular Grant (EG), New South Wales Health Senior Scientist Cardiovascular Grant (RG194194), New South Wales Health Senior Clinician Cardiovascular Grant (RMG RG193092), the Bourne Foundation, Agilent, SCAD research Inc., National Institutes of Health (NIH) T32 GM72474, R01HL139672, R35HL161016, R35HL161016, R01HL086694, R01HL148167, R01HL147883, the Genome Consortia, Mayo Clinic Center for Individualized Medicine, Heart and Stroke Foundation of Canada (G-17-0016340), Canadian Institutes of Health Research (grant #136799), and the University of Michigan Frankel Cardiovascular Center, a Canada Research Chair in Precision Cardiovascular Disease Prevention, M-BRISC program, Department of Defense, the A. Alfred Taubman Institute, a Michael Smith Foundation for Health Research Scholar award, FMD Society of America, the American Heart Association (pre-doctoral fellowship 829009), and UCLA Integrative Biology and Physiology Edith Hyde fellowship. Genotyping was supported by the Spanish National Cancer Research Centre, in the Human Genotyping lab, a member of CeGen Biomolecular resources platform (PRB3), to be supported by grant PT17 /0019, of the PE I+D+i 2013-2016, funded by Instituto de Salud Carlos III and a European regional development fund (ERDF), *Fondation Alzheimer* (Paris, France), The University of Michigan Advanced Genomics Core. The MEGASTROKE project received funding from sources specified at <http://www.megastroke.org/acknowledgments.html>. We thank AstraZeneca's Centre for Genomics Research, Discovery Sciences, BioPharmaceuticals R&D for funding the sequencing of and providing the bioinformatics support related to subjects in cohort SCAD-UK I. The Genotype-Tissue Expression (GTEx) Project was supported by the Common Fund of the Office of the Director of the National Institutes of Health, and by NCI, NHGRI, NHLBI, NIDA, NIMH, and NINDS. Full list of specific studies' funding is provided in the **Supplementary Material**.

### Disclosures

Dr Adlam has received in kind support from Astra Zeneca inc. to support gene sequencing in SCAD patients and grant funding for unrelated research, research funding from Abbott vascular to support a clinical research fellow and has undertaken consultancy for General Electric inc. to support research funds. He holds unrelated patents EP3277337A1 and PCT/GB2017/050877.

### Authors contributions

Writing of the manuscript: DA, T-EB, AG, NJS, NB-N. Study design / conception of analyses: DA, T-EB, AG, CPN, EG, MST, RG, DK-D, JS, SNH, XY, SKG, TMO, JCK, RMG, NJS, NB-N. Genotyping: DA, AG, CPN, LM, TNT, MLY, PSB, SEI, MLK, SHE, LL, Vd'E, AB-C, KJ, TRW, SKG, TMO, JK, NB-N. Sample /phenotype contribution: DA, IT, DWMM, Vd'E, AK, LB, SD, PA, JWO, SEH, MST, RG, NC, DK-D, JS, LB, SKG, JK, DF, SNH, JCK, RMG. Data analysis: T-EB, AG, CPN, EG, JH, LM, MB, M-LY, IS-S, MLK, XZ, JC, IT, SP, SGK, KA, AB, XY, JCK, NB-N. Scientific editing of the manuscript: DA, T-EB, AG, JH, TNT, SKG, MST, RMG, TRW, SNH, WY, TMO, JCK, NJS, NB-N.



## Methods

### Patients and control populations

The meta-analysis included participants of European ancestry from eight studies: DISCO-3C, SCAD-UK I, SCAD-UK II, Mayo Clinic, DEFINE-SCAD, CanSCAD/MGI, VCCRI I and VCCRI II. SCAD patients presented similar clinical characteristics (**Supplementary Table 1**) and homogeneous diagnosis, exclusion and inclusion criteria. All studies were approved by national and/or institutional ethical review boards. Further study-specific clinical details are provided in the **Supplementary Material**.

### Genome-wide association meta-analysis

Details on the pre-imputation quality control steps for each study are listed in **Supplementary Table 13**. In brief, genotyping was performed using commercially available arrays or genome sequencing (SCAD-UK Study II and VCCRI Study II). To increase the number of tested SNPs and the overlap of variants available for analysis between different arrays, all European ancestry cohorts, except for SCAD-UK Study II and VCCRI Study II, had their genotypes imputed to HRC v1.1 reference panel<sup>39</sup> on the Michigan Imputation Server.<sup>40</sup> GWAS was conducted in each study under an additive genetic model using PLINK v2.0.<sup>41</sup> For chromosome X, males and females were both on a 0..2 scale under the chromosome X inactivation assumption model. Models were adjusted for population structure using residues from the first five principal components and sex, except in the women-only analyses. Prior to meta-analysis, we removed single nucleotide polymorphisms (SNPs) with low minor allele frequencies (MAF < 0.01), low imputation quality ( $r^2 < 0.8$ ), and deviations from Hardy-Weinberg equilibrium ( $P < 10^{-5}$ ). A total of 6,697,670 variants met these criteria and were kept in the final results.

Individual studies GWAS results were combined using an inverse variance weighted fixed-effects meta-analysis in METAL software,<sup>42</sup> with correction for genomic control. Heterogeneity was assessed using the  $I^2$  metric from the complete study-level meta-analysis. Between-study heterogeneity was tested using the Cochran Q statistic and considered significant at  $P \leq 10^{-3}$ . Genome-wide significance threshold was set at the level of  $P = 5.0 \times 10^{-8}$ . LocusZoom (<http://locuszoom.org/>) was used to provide regional visualization of results.

### Functional annotation

Identification of potential functional variants. To generate a list of potential functional variants, we first identified the 95% credible set of variants using pfunc function of corrcoverage R package (v1.2.1). Posterior probability of causality was evaluated from marginal Z-scores for all variants within 500kb of the lead SNP at each locus. In the *COL4A1-COL4A2* locus, where we found two association signals, these were separated by placing an equidistant border from each lead SNP for the inclusion of SNPs in the analysis. Variants with cumulated posterior probability up to 95% were kept for further analyses. To consider potentially poorly imputed variants in one of the individual case-control studies, we also included variants in high LD ( $r^2 > 0.7$ ) with the lead SNP at each locus based on information from European populations (1000 Genome reference panel) queried using ldproxy function of LDlinkR package (v1.1.2).<sup>43</sup>



***Enrichment of SCAD variants in regulatory regions.*** To calculate the enrichment of SCAD associated SNPs among functionally annotated genomic regions, we retrieved available H3K27ac ChIP-Seq datasets (narrowpeaks beds) in any tissue from ENCODE (<https://www.encodeproject.org/>),<sup>44</sup> and single nuclei ATAC-Seq peak files (bed format) from Human enhancer atlas (<http://catlas.org/humanenhancer>).<sup>25</sup> A complete list of datasets is available in **Supplementary Table 14**. For H3K27ac marks, bed files corresponding to the same tissue were concatenated and sorted before combining overlapping peaks using bedtools (v2.29.0) merge command. Variant enrichment was calculated using rtracklayer (v1.52.1) package as follows: for each peak file, 1000 datasets matched by peak number and sizes for each chromosome were generated. Positions of SCAD potential functional variants were converted to hg38 genomic coordinates using UCSC liftover tool (<https://genome-store.ucsc.edu/>). We counted overlaps of SCAD potential functional variants with peak file and background files using countOverlaps function. Variant enrichment was defined as the ratio of the number of overlaps between peak set and average of background sets. Enrichment *P*-value was evaluated using a binomial test with higher enrichment as alternative hypothesis. *P*-values were adjusted for multiple testing by the application of the Bonferroni correction.

***Identification of variants with potential regulatory function.*** We used H3K27ac peaks in coronary arteries as described above, open chromatin regions in healthy coronary arteries obtained as previously described<sup>32,45</sup> and open chromatin regions from merged snATAC-Seq clusters, which were mapped fragments from snATAC-Seq in 25 adult tissues that we retrieved from GEO (GSE184462<sup>25</sup>) in bed format. Mapped fragments from all clusters representing more than 1% of cells in at least one arterial tissue (T lymphocyte 1, CD8<sup>+</sup>), endothelial general 2, endothelial general 1, macrophage general, fibro general, vasc sm muscle 2, vasc sm muscle 1) were extracted and grouped by annotated cell type as T-lymphocytes, macrophages, fibroblasts, endothelial cells, and vascular smooth muscle cells, respectively. Genome coverage was calculated using bedtools (v2.29.0) coverage function. We detected peaks from bedGraph output using MACS2 bdgpeakcall function (Galaxy Version 2.1.1.20160309.0) on Galaxy webserver.<sup>46,47</sup> All peak files were extended 100bp upstream and downstream using bedtools (v2.29.0) slop function. We detected overlaps of SCAD potential functional variants with relevant genomic regions using findOverlap function from rtracklayer package (v1.52.1).<sup>48</sup> We used Integrated Genome Browser (IGB, v9.1.8) to visualize read density profiles and peak positions in the context of human genome.<sup>49</sup>

***Gene prioritization.*** Genes located within 500kb of lead variants were annotated to prioritize most likely causal genes. To find closest gene(s) from top SNP and genes overlapping variants in the list of potential functional SNPs, gene coordinates were retrieved from Gencode release 38, aligned to hg19 genomic coordinates (gencode.v38lift37.annotation.gff3.gz). Significant eQTL associations and all SNP-gene eQTL associations in v8 release of GTEx database were retrieved from GTEx website ([www.gtexportal.org/home/datasets](http://www.gtexportal.org/home/datasets)). Colocalization of association with SCAD and eQTLs was evaluated using R coloc package (v5.1.0) with default values as priors. We considered there was evidence for colocalization if H4 coefficients were over 75% or if eQTL association was significant for SCAD lead SNP and H4 was over 25%. TWAS was performed using FUSION R/python package.<sup>50</sup> Gene expression models were pre-computed from GTEx data (v7 release) and were provided by the authors. Only genes with heritability *P*-value < 0.01 were used in the analysis. Both tools used LD information from the European panel of the 1000 Genomes phase 3. Bonferroni multiple testing correction was

applied using the `p.adjust` function in R (v 4.1.0). Significant Capture HiC hits in aorta tissue were provided as supplementary data by Jung et al.<sup>51</sup> Genes associated to mouse cardiovascular phenotypes (code MP:0005385) were retrieved from Mouse Genome informatics ([www.informatics.jax.org](http://www.informatics.jax.org)) database.<sup>52</sup> We also queried Disgenet database using `disgenet2r` package (v0.99.2) for genes with reported association to human cardiovascular disease (code C14) with a score over 0.2, including “ALL” databases.<sup>53</sup> At each locus, we prioritized genes fulfilling at least 3 of the abovementioned criteria and those genes with the most criteria if these were less than three.

***Bayesian network query of SCAD candidate genes.*** Gene expression data from aorta artery, coronary artery, tibial artery, and cultured fibroblast was curated from the Genotype Tissue Expression (GTEx) version 8.<sup>27</sup> Gene expression data from the mouse aorta was curated from the Hybrid Mouse Diversity Panel (HMDP).<sup>26</sup> Tissue-specific gene regulatory Bayesian networks (BNs) were constructed from the GTEx and HMDP gene expression data using RIMBANET.<sup>28</sup> The BN from each dataset included only network edges that passed a probability of >30% across 1000 generated BNs starting from different random genes. BNs were combined for the top GWAS hits query, and mouse gene symbols were converted to their human orthologs. BNs were queried for the identified top GWAS hits to identify their first-degree network connections and to determine connections between their surrounding subnetwork nodes. The direction of edges was informed by prior knowledge such as eQTLs and previously known regulatory relationships between genes. Subnetworks were annotated by top biological pathways representative of the subnetwork genes by Enrichr with FDR <0.05.

### **Colocalization with other traits and diseases**

Summary statistics were retrieved from individual studies as indicated in **Supplementary Table 15**. At each locus, we selected variants found in both SCAD and the other studies with high quality of imputation ( $r^2 > 0.9$ ) and located within 500kb from the SCAD lead SNP. *COL4A1-COL4A2* loci were separated by placing an equidistant border from SCAD lead SNPs for the inclusion of SNPs in the analysis. Signal colocalization was evaluated using R `coloc` package (v5.1.0) with default values as priors. We reported H4 coefficients indicating the probability for two signals to share a common causal variant at each locus.

### **Heritability estimates and genetic correlation attributable to common variants**

We used LD score regression (LDSC)<sup>22</sup> implemented in the `ldsc` package (v1.0.1, <https://github.com/bulik/ldsc/>) and SumHer<sup>23</sup> implemented in LDAK software ([www.ldak.org](http://www.ldak.org)) to quantify the heritability explained by common variants or SNP-based heritability ( $h^2_{\text{SNP}}$ ) for SCAD and the degree of genetic correlation between SCAD and other diseases and traits. We also used SumHer to estimate the SNP-based heritability attributable to loci associated with SCAD at genome-wide statistical significance. Loci were defined as 1 megabase region around lead SNPs in the GWAS meta-analysis. SNPs belonging to each locus were used as annotations to calculate the partitioned heritability. Two analyses were performed, one that considered separated loci and a second analysis that aggregated all SNPs as one annotation. Summary statistics were acquired from the respective consortia and are detailed in **Supplementary Table 15**. For each trait, we refined the summary statistics to the subset of HapMap 3 SNPs to reduce potential bias due to poor imputation quality. Correlation analyses were restricted to

European ancestry meta-analyses summary statistics. We used the European LD-score files calculated from the 1000G reference panel and provided by the developers. A  $P < 1.7 \times 10^{-3}$ , corresponding to adjustment for 30 independent phenotypes was considered significant. We conditioned SCAD association on cardiometabolic traits genetic association using multi-trait-based conditional and joint analysis (mtCOJO) tool from GCTA pipeline.<sup>30</sup> The resulting summary statistics were then used to compute genetic correlations between SCAD, conditioned on cardiometabolic traits and trait of interest.

### **Mendelian randomisation (MR) analyses**

We used the multiplicative random-effects inverse variance weighted (IVW) method<sup>54</sup> implemented in the TwoSampleMR R package to estimate the associations of genetically predicted cardiovascular risk factors that included blood pressure (SBP, DBP), lipids (HDL, LDL, TC, TG), body mass index (BMI), smoking liability and type 2 diabetes (T2D) with each of the outcomes of interest (SCAD or CAD). Estimates were scaled to a doubling in genetically predicted smoking risk, or to a one-unit increase in genetically predicted trait for the continuous traits. We performed sensitivity analyses using the weighted median and MR-Egger methods to assess the consistency of estimates under alternative assumptions about genetic pleiotropy as recommended.<sup>54</sup> We also performed Cochran's Q test to assess the heterogeneity between estimates obtained using different variants. As 11 risk factors were assessed, a Bonferroni-corrected significance level of  $0.05/11 = 4.5 \times 10^{-3}$  was used as the threshold for statistical significance in this analysis. P-values between  $4.5 \times 10^{-3}$  and 0.05 are described as suggestively significant.

### **REFERENCES**

- 1 Vogel, B. *et al.* The Lancet women and cardiovascular disease Commission: reducing the global burden by 2030. *Lancet* **397**, 2385-2438, doi:10.1016/S0140-6736(21)00684-X (2021).
- 2 Adlam, D., Alfonso, F., Maas, A., Vrints, C. & Writing, C. European Society of Cardiology, acute cardiovascular care association, SCAD study group: a position paper on spontaneous coronary artery dissection. *Eur Heart J* **39**, 3353-3368, doi:10.1093/eurheartj/ehy080 (2018).
- 3 Collet, J. P. *et al.* 2020 ESC Guidelines for the management of acute coronary syndromes in patients presenting without persistent ST-segment elevation. *Eur Heart J*, doi:10.1093/eurheartj/ehaa575 (2020).
- 4 Hayes, S. N. *et al.* Spontaneous Coronary Artery Dissection: Current State of the Science: A Scientific Statement From the American Heart Association. *Circulation* **137**, e523-e557, doi:10.1161/CIR.0000000000000564 (2018).
- 5 Hayes, S. N. *et al.* Spontaneous Coronary Artery Dissection: JACC State-of-the-Art Review. *J Am Coll Cardiol* **76**, 961-984, doi:10.1016/j.jacc.2020.05.084 (2020).
- 6 Ibanez, B. *et al.* 2017 ESC Guidelines for the management of acute myocardial infarction in patients presenting with ST-segment elevation: The Task Force for the management of acute myocardial infarction in patients presenting with ST-segment elevation of the European Society of Cardiology (ESC). *Eur Heart J* **39**, 119-177, doi:10.1093/eurheartj/ehx393 (2018).

- 7 Kim, E. S. H. Spontaneous Coronary-Artery Dissection. *N Engl J Med* **383**, 2358-2370, doi:10.1056/NEJMra2001524 (2020).
- 8 Margaritis, M. *et al.* Vascular histopathology and connective tissue ultrastructure in spontaneous coronary artery dissection: pathophysiological and clinical implications. *Cardiovasc Res*, doi:10.1093/cvr/cvab183 (2021).
- 9 Kok, S. N. *et al.* Prevalence and Clinical Factors of Migraine in Patients With Spontaneous Coronary Artery Dissection. *J Am Heart Assoc* **7**, e010140, doi:10.1161/JAHA.118.010140 (2018).
- 10 Combaret, N. *et al.* National French Registry of Spontaneous Coronary Artery Dissections: Prevalence of Fibromuscular Dysplasia and Genetic Analyses. *EuroIntervention*, doi:10.4244/EIJ-D-20-01046 (2020).
- 11 Persu, A. *et al.* Prevalence and Disease Spectrum of Extracoronary Arterial Abnormalities in Spontaneous Coronary Artery Dissection. *JAMA Cardiol* **7**, 159-166, doi:10.1001/jamacardio.2021.4690 (2022).
- 12 Prasad, M. *et al.* Prevalence of extracoronary vascular abnormalities and fibromuscular dysplasia in patients with spontaneous coronary artery dissection. *The American journal of cardiology* **115**, 1672-1677, doi:10.1016/j.amjcard.2015.03.011 (2015).
- 13 Saw, J., Ricci, D., Starovoytov, A., Fox, R. & Buller, C. E. Spontaneous coronary artery dissection: prevalence of predisposing conditions including fibromuscular dysplasia in a tertiary center cohort. *JACC. Cardiovascular interventions* **6**, 44-52, doi:10.1016/j.jcin.2012.08.017 (2013).
- 14 Jackson, R. *et al.* Distinct and complementary roles for alpha and beta isoenzymes of PKC in mediating vasoconstrictor responses to acutely elevated glucose. *Br J Pharmacol* **173**, 870-887, doi:10.1111/bph.13399 (2016).
- 15 Erdmann, J., Kessler, T., Munoz Venegas, L. & Schunkert, H. A decade of genome-wide association studies for coronary artery disease: the challenges ahead. *Cardiovasc Res* **114**, 1241-1257, doi:10.1093/cvr/cvy084 (2018).
- 16 Amrani-Midoun, A., Adlam, D. & Bouatia-Naji, N. Recent Advances on the Genetics of Spontaneous Coronary Artery Dissection. *Circ Genom Precis Med* **14**, e003393, doi:10.1161/CIRCGEN.121.003393 (2021).
- 17 Adlam, D. *et al.* Association of the PHACTR1/EDN1 Genetic Locus With Spontaneous Coronary Artery Dissection. *J Am Coll Cardiol* **73**, 58-66, doi:10.1016/j.jacc.2018.09.085 (2019).
- 18 Saw, J. *et al.* Chromosome 1q21.2 and additional loci influence risk of spontaneous coronary artery dissection and myocardial infarction. *Nat Commun* **11**, 4432, doi:10.1038/s41467-020-17558-x (2020).
- 19 Turley, T. N. *et al.* Susceptibility Locus for Pregnancy-Associated Spontaneous Coronary Artery Dissection. *Circ Genom Precis Med* **14**, e003398, doi:10.1161/CIRCGEN.121.003398 (2021).
- 20 Turley, T. N. *et al.* Identification of Susceptibility Loci for Spontaneous Coronary Artery Dissection. *JAMA Cardiol* **5**, 929-938, doi:10.1001/jamacardio.2020.0872 (2020).
- 21 Saw, J. *et al.* Chromosome 1q21.2 and additional loci influence risk of spontaneous coronary artery dissection and myocardial infarction. *Nat Commun* **11**, 4432, doi:10.1038/s41467-020-17558-x (2020).

- 22 Bulik-Sullivan, B. K. *et al.* LD Score regression distinguishes confounding from polygenicity in genome-wide association studies. *Nature genetics* **47**, 291-295, doi:10.1038/ng.3211 (2015).
- 23 Speed, D. & Balding, D. J. SumHer better estimates the SNP heritability of complex traits from summary statistics. *Nature genetics* **51**, 277-284, doi:10.1038/s41588-018-0279-5 (2019).
- 24 An integrated encyclopedia of DNA elements in the human genome. *Nature* **489**, 57-74, doi:10.1038/nature11247 (2012).
- 25 Zhang, K. *et al.* A single-cell atlas of chromatin accessibility in the human genome. *Cell* **184**, 5985-6001 e5919, doi:10.1016/j.cell.2021.10.024 (2021).
- 26 Bennett, B. J. *et al.* Genetic Architecture of Atherosclerosis in Mice: A Systems Genetics Analysis of Common Inbred Strains. *PLoS Genet* **11**, e1005711, doi:10.1371/journal.pgen.1005711 (2015).
- 27 Consortium, G. T. The GTEx Consortium atlas of genetic regulatory effects across human tissues. *Science* **369**, 1318-1330, doi:10.1126/science.aaz1776 (2020).
- 28 Zhu, J. *et al.* An integrative genomics approach to the reconstruction of gene networks in segregating populations. *Cytogenet Genome Res* **105**, 363-374, doi:10.1159/000078209 (2004).
- 29 Saw, J. *et al.* Canadian spontaneous coronary artery dissection cohort study: in-hospital and 30-day outcomes. *Eur Heart J* **40**, 1188-1197, doi:10.1093/eurheartj/ehz007 (2019).
- 30 Zhu, Z. *et al.* Causal associations between risk factors and common diseases inferred from GWAS summary data. *Nat Commun* **9**, 224, doi:10.1038/s41467-017-02317-2 (2018).
- 31 Carss, K. J. *et al.* Spontaneous Coronary Artery Dissection: Insights on Rare Genetic Variation From Genome Sequencing. *Circ Genom Precis Med* **13**, e003030, doi:10.1161/CIRCGEN.120.003030 (2020).
- 32 Georges, A. *et al.* Genetic investigation of fibromuscular dysplasia identifies risk loci and shared genetics with common cardiovascular diseases. *Nat Commun* **12**, 6031, doi:10.1038/s41467-021-26174-2 (2021).
- 33 Evangelou, E. *et al.* Genetic analysis of over 1 million people identifies 535 new loci associated with blood pressure traits. *Nature genetics* **50**, 1412-1425, doi:10.1038/s41588-018-0205-x (2018).
- 34 Kobayashi, Y. *et al.* Mice lacking hypertension candidate gene ATP2B1 in vascular smooth muscle cells show significant blood pressure elevation. *Hypertension* **59**, 854-860, doi:10.1161/HYPERTENSIONAHA.110.165068 (2012).
- 35 Saw, J. *et al.* Spontaneous Coronary Artery Dissection: Clinical Outcomes and Risk of Recurrence. *J Am Coll Cardiol* **70**, 1148-1158, doi:10.1016/j.jacc.2017.06.053 (2017).
- 36 Moons, A. H., Levi, M. & Peters, R. J. Tissue factor and coronary artery disease. *Cardiovasc Res* **53**, 313-325, doi:10.1016/s0008-6363(01)00452-7 (2002).
- 37 Aragam, K. G. *et al.* Discovery and systematic characterization of risk variants and genes for coronary artery disease in over a million participants. *medRxiv*, 2021.2005.2024.21257377, doi:10.1101/2021.05.24.21257377 (2021).
- 38 Steffensen, L. B. & Rasmussen, L. M. A role for collagen type IV in cardiovascular disease? *Am J Physiol Heart Circ Physiol* **315**, H610-H625, doi:10.1152/ajpheart.00070.2018 (2018).



- 39 Loh, P. R. *et al.* Reference-based phasing using the Haplotype Reference Consortium panel. *Nature genetics* **48**, 1443-1448, doi:10.1038/ng.3679 (2016).
- 40 Das, S. *et al.* Next-generation genotype imputation service and methods. *Nature genetics* **48**, 1284-1287, doi:10.1038/ng.3656 (2016).
- 41 Chang, C. C. *et al.* Second-generation PLINK: rising to the challenge of larger and richer datasets. *GigaScience* **4**, 7, doi:10.1186/s13742-015-0047-8 (2015).
- 42 Willer, C. J., Li, Y. & Abecasis, G. R. METAL: fast and efficient meta-analysis of genomewide association scans. *Bioinformatics* **26**, 2190-2191, doi:10.1093/bioinformatics/btq340 (2010).
- 43 Myers, T. A., Chanock, S. J. & Machiela, M. J. LDlinkR: An R Package for Rapidly Calculating Linkage Disequilibrium Statistics in Diverse Populations. *Front Genet* **11**, 157, doi:10.3389/fgene.2020.00157 (2020).
- 44 Davis, C. A. *et al.* The Encyclopedia of DNA elements (ENCODE): data portal update. *Nucleic Acids Res* **46**, D794-D801, doi:10.1093/nar/gkx1081 (2018).
- 45 Miller, C. L. *et al.* Integrative functional genomics identifies regulatory mechanisms at coronary artery disease loci. *Nat Commun* **7**, 12092, doi:10.1038/ncomms12092 (2016).
- 46 Feng, J., Liu, T., Qin, B., Zhang, Y. & Liu, X. S. Identifying ChIP-seq enrichment using MACS. *Nat Protoc* **7**, 1728-1740, doi:10.1038/nprot.2012.101 (2012).
- 47 Afgan, E. *et al.* The Galaxy platform for accessible, reproducible and collaborative biomedical analyses: 2018 update. *Nucleic Acids Res* **46**, W537-W544, doi:10.1093/nar/gky379 (2018).
- 48 Lawrence, M., Gentleman, R. & Carey, V. rtracklayer: an R package for interfacing with genome browsers. *Bioinformatics* **25**, 1841-1842, doi:10.1093/bioinformatics/btp328 (2009).
- 49 Freese, N. H., Norris, D. C. & Loraine, A. E. Integrated genome browser: visual analytics platform for genomics. *Bioinformatics* **32**, 2089-2095, doi:10.1093/bioinformatics/btw069 (2016).
- 50 Gusev, A. *et al.* Integrative approaches for large-scale transcriptome-wide association studies. *Nature genetics* **48**, 245-252, doi:10.1038/ng.3506 (2016).
- 51 Jung, I. *et al.* A compendium of promoter-centered long-range chromatin interactions in the human genome. *Nature genetics* **51**, 1442-1449, doi:10.1038/s41588-019-0494-8 (2019).
- 52 Bult, C. J. *et al.* Mouse Genome Database (MGD) 2019. *Nucleic Acids Res* **47**, D801-D806, doi:10.1093/nar/gky1056 (2019).
- 53 Pinero, J. *et al.* The DisGeNET knowledge platform for disease genomics: 2019 update. *Nucleic Acids Res* **48**, D845-D855, doi:10.1093/nar/gkz1021 (2020).
- 54 Burgess, S., Small, D. S. & Thompson, S. G. A review of instrumental variable estimators for Mendelian randomization. *Stat Methods Med Res* **26**, 2333-2355, doi:10.1177/0962280215597579 (2017).
- 55 Yavorska, O. O. & Burgess, S. MendelianRandomization: an R package for performing Mendelian randomization analyses using summarized data. *Int J Epidemiol* **46**, 1734-1739, doi:10.1093/ije/dyx034 (2017).
